# Supplementary material for: Singlet oxygen generation properties of an inclusion complex of cyclic free-base porphyrin dimer and fullerene C60
Source: Royal Society of Chemistry journal article supplement (doi:10.1039/c7ra02699d), 2017-01-01
Supplement: c7ra02699d1.pdf [file c7ra02699d1.pdf]

## Supplementary Information

### **Singlet oxygen generation property of inclusion complex of cyclic free-base porphyrin dimer and fullerene C<sub>60</sub>**

Yousuke Ooyama,<sup>\*a</sup> Toshiaki Enoki,<sup>a</sup> Joji Ohshita,<sup>a</sup> Takuya Kamimura,<sup>b</sup> Shuwa Ozako,<sup>b</sup>  
Taro Koide,<sup>b</sup> and Fumito Tani<sup>\*b</sup>

<sup>a</sup> *Department of Applied Chemistry, Graduate School of Engineering, Hiroshima University, Higashi-Hiroshima, 739-8527, Japan.*

*E-mail: yooyama@hiroshima-u.ac.jp; Fax: (+81) 82-424-5494*

<sup>b</sup> *Institute for Materials Chemistry and Engineering, Kyushu University, 744 Motoooka, Nishi-ku, Fukuoka 819-0395, Japan.*

*E-mail: tanif@ms.ifoc.kyushu-u.ac.jp; Fax: (+81)-92-802-6224*

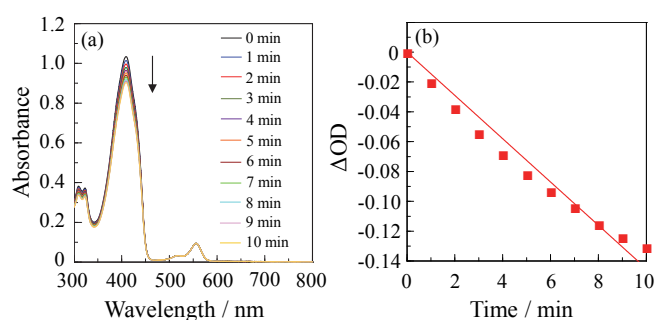

**Figs. S1** (a) Photoabsorption spectral change and (b) plot of  $\Delta OD$  for DPBF against the photoirradiation time for the photooxidation of DPBF (Abs. = ca. 1.0) using Rose Bengal ( $1.26 \times 10^{-6}$  M) as photosensitizer under photoirradiation with 509 nm ( $300 \mu\text{W cm}^{-2}$ ) in methanol.

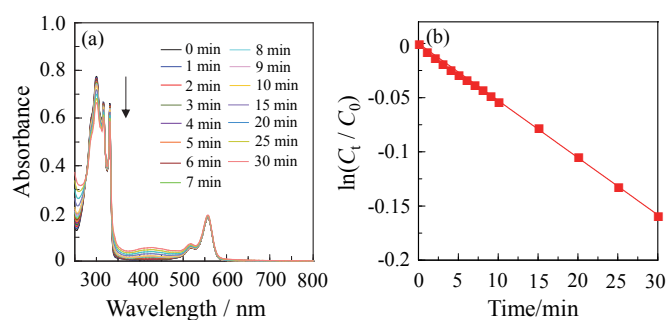

**Fig. S2** (a) Photoabsorption spectral change and (b) plot of  $\ln(C_t/C_0)$  for DHN against the photoirradiation time for the photooxidation of DHN ( $C_0 = 1.0 \times 10^{-4}$  M) using Rose Bengal ( $2.5 \times 10^{-6}$  M) as photosensitizer under photoirradiation with visible light ( $> 385$  nm,  $30 \text{ mW cm}^{-2}$ ) in  $\text{CH}_2\text{Cl}_2/\text{MeOH}$  (= 1/1, v/v).
